# Supplementary material for: Enhancing the performance of dye-sensitized solar cells: doping SnO2photoanodes with Al to simultaneously improve conduction band and electron lifetime
Source: Royal Society of Chemistry journal article supplement (doi:10.1039/c4ta05923a), 2014-12-09
Supplement: c4ta05923a1.pdf [file c4ta05923a1.pdf]

## Electronic Supplementary Information for

# Al-doping to Synchronously Improve Conduction Band and Electron Lifetime for SnO<sub>2</sub> Photoanode to Enhance Dye-Sensitized Solar Cells Performances

Yandong Duan,<sup>†ab</sup> Jiaxin Zheng,<sup>†a</sup> Nianqing Fu,<sup>bc</sup> Yanyan Fang,<sup>b</sup> Tongchao Liu,<sup>a</sup> Qian Zhang,<sup>d</sup> Xiaowen Zhou,<sup>b</sup> Yuan Lin,<sup>\*ab</sup> and Feng Pan<sup>\*a</sup>

<sup>a</sup> School of Advanced Materials, Peking University, Peking University Shenzhen Graduate School, Shenzhen 518055, China. E-mail: linyuan@iccas.ac.cn; panfeng@pkusz.edu.cn; Tel: 86-0755-26033200.

<sup>b</sup> Beijing National Laboratory for Molecular Sciences, Key Laboratory of Photochemistry, Institute of Chemistry, Chinese Academy of Sciences, Beijing 100190, China.

<sup>c</sup> Department of Applied Physics, The Hong Kong Polytechnic University, Hung Hom, Kowloon, Hong Kong, China.

<sup>d</sup> State Key Laboratory for Advanced Metals and Materials, School of Materials Science and Engineering, University of Science and Technology Beijing, Beijing 100083, China.

† Y. D. Duan and J. X. Zheng contributed equally to this work.

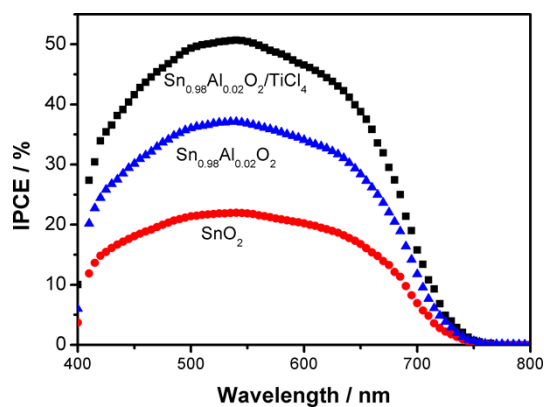

**Fig. S1** IPCE of the fabricated DSSCs with  $\text{SnO}_2$ ,  $\text{Sn}_{0.98}\text{Al}_{0.02}\text{O}_2$ , and  $\text{Sn}_{0.98}\text{Al}_{0.02}\text{O}_2/\text{TiCl}_4$  as photoanodes.

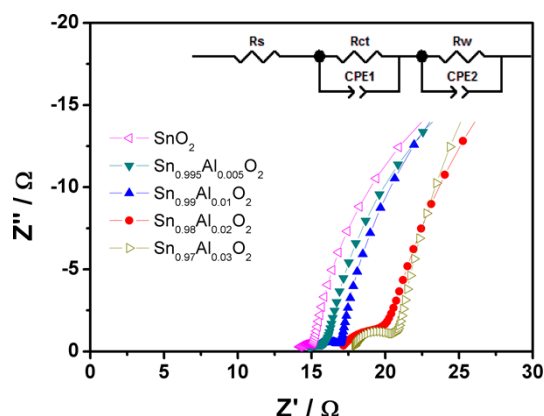

**Fig. S2** EIS spectra of the  $\text{SnO}_2$  and the Al-doped  $\text{SnO}_2$  DSSCs. The inset of EIS plots represents the equivalent circuit for EIS.

**Table S1** Comparison for the photovoltaic performance of the DSSCs based on different  $\text{SnO}_2$  photoanode structures ( $\text{SnO}_2$ ,  $\text{SnO}_2/\text{TiO}_2$ , and  $\text{SnO}_2/\text{ZnO}$  composites).

| Ref. | Morphology or structure            | Diameter                        | DSSCs based on $\text{SnO}_2$ photoanode |                     |                                   |                                                   |
|------|------------------------------------|---------------------------------|------------------------------------------|---------------------|-----------------------------------|---------------------------------------------------|
|      |                                    |                                 | Synthetic method or manufacturer         | Film thickness      | $\eta$ (%) (No surface treatment) | $\eta$ (%) (After surface treatment) <sup>a</sup> |
| S1   | $\text{SnO}_2$ nanoparticles       | 10-30 nm                        | NanoTek, SNW15WT%-G02                    | 6 $\mu\text{m}$     | 2.3                               | ---                                               |
| S2   | $\text{SnO}_2$ nanoparticles       | 3-5 nm                          | Alfa Aesar                               | 10 $\mu\text{m}$    | 1.74                              | MgO/7.21                                          |
| S3   | $\text{SnO}_2$ nanowire            | 20-200 nm                       | reactive vapor transport                 | 25-30 $\mu\text{m}$ | 2.1                               | $\text{TiCl}_4$ /4.1                              |
| S4   | $\text{SnO}_2$ hollow microspheres | 1-2 $\mu\text{m}$               | hydrothermal                             | 10 $\mu\text{m}$    | 1.4                               | $\text{TiCl}_4$ /5.65                             |
| S5   | coral-like $\text{SnO}_2$          | 300 nm $\times$ 2 $\mu\text{m}$ | wet-chemical                             | ---                 | 1.04                              | ---                                               |
| S6   | $\text{SnO}_2$ nanoparticles       | 15 nm                           | Alfa Aesar                               | 4 $\mu\text{m}$     | 0.76                              | $\text{Al}_2\text{O}_3$ /3.7                      |
| S7   | meso- $\text{SnO}_2$               | 20 nm pores                     | hard template method                     | 3 $\mu\text{m}$     | 1.1                               | $\text{TiCl}_4$ /3.8                              |
| S8   | $\text{SnO}_2$ nanoflower          | 1 $\mu\text{m}$                 | hydrothermal                             | 8-10 $\mu\text{m}$  | 3.00                              | $\text{TiCl}_4$ /6.78                             |

|                 |                                                     |                     |                        |             |             |                              |
|-----------------|-----------------------------------------------------|---------------------|------------------------|-------------|-------------|------------------------------|
| S9              | SnO <sub>2</sub> nanoparticles                      | 15 nm               | Alfa Aesar             | 5 μm        | 1.14        | NiO/1.85                     |
| S10             | SnO <sub>2</sub> nanoparticles                      | 15 nm               | Alfa Aesar             | ---         | 1.7         | CaCO <sub>3</sub> /5.4       |
| S11             | nanoporous SnO <sub>2</sub>                         | 4 nm/>100 nm        | Alfa Aesar /Aldrich    | 1-5μm       | 2.27        | ---                          |
| S12             | SnO <sub>2</sub> nanocrystals                       | 100 nm              | microwave solvothermal | 10-12μm     | 3.16        | ---                          |
| S13             | SnO <sub>2</sub> nanoarborous structure             | ---                 | electrodeposition      | 15μm        | 0.47        | ---                          |
| S14             | SnO <sub>2</sub> nanopowder                         | <100 nm             | Sigma-Aldrich          | 8μm         | 3.65        | MgO/6.40                     |
| S15             | SnO <sub>2</sub> nanotube                           | 110 nm              | electrospinning        | 13μm        | 0.99        | TiCl <sub>4</sub> /5.11      |
| S16             | SnO <sub>2</sub> nanowires                          | 75±25 nm            | electrospinning        | 19±2 μm     | 2.53        | ---                          |
| S17             | Zn-doped SnO <sub>2</sub> nano-echinus              | 1 μm                | solvothermal           | 11μm        | 4.15        | ---                          |
| S18             | SnO <sub>2</sub> nanoparticles                      | 100 nm              | hydrothermal           | ---         | 0.85        | 4.15                         |
| S19             | SnO <sub>2</sub> hollow nanospheres                 | 200 nm              | hydrothermal           | ---         | 0.86        | TiCl <sub>4</sub> /6.02      |
| S20             | SnO <sub>2</sub> octahedra                          | 0.5-1.8 μm          | sonochemical           | 13.2 μm     | ---         | TiCl <sub>4</sub> /6.8       |
| S21             | SnO <sub>2</sub> nanosheet                          | thickness:4-6 nm    | hydrothermal           | 4.1μm       | 0.23        | TiCl <sub>4</sub> /1.79      |
| S22             | mesoporous SnO <sub>2</sub> agglomerates            | 200-600 nm          | molten salt method     | 8 μm        | 3.05        | TiCl <sub>4</sub> /6.23      |
| S23             | N-SnO <sub>2</sub> mesoporous microspheres          | 1.2-1.5 μm          | one-pot solvothermal   | ---         | 2.3         | ---                          |
| S24             | Sb-doped SnO <sub>2</sub> aerogels cauliflower-like | ---                 | sol-gel                | 10μm        | 0.7         | ALD TiO <sub>2</sub> /3.5    |
| S25             | SnO <sub>2</sub> hollow microspheres                | 500 nm-2 μm         | hydrothermal           | 11μm        | ---         | 3.6                          |
| S26             | SnO <sub>2</sub> nanofibers                         | 200 nm              | ---                    | 8.7 μm      | --          | TiCl <sub>4</sub> /4.63      |
| S27             | SnO <sub>2</sub> nanoparticles                      | 11.2-26.2 nm        | microwave hydrothermal | 13-15 μm    | 1.35        | ---                          |
| S28             | SnO <sub>2</sub> nanoflower                         | 1μm                 | hydrothermal           | --          | 1.05        | TiCl <sub>4</sub> /5.6       |
| <b>Our work</b> | <b>Al-SnO<sub>2</sub> nanocrystals</b>              | <b>11.6-15.9 nm</b> | <b>hydrothermal</b>    | <b>8 μm</b> | <b>3.56</b> | <b>TiCl<sub>4</sub>/6.91</b> |

DSSCs based on SnO<sub>2</sub>/TiO<sub>2</sub> and SnO<sub>2</sub>/ZnO composites

|     |                                                    |     |                  |        |     |                         |
|-----|----------------------------------------------------|-----|------------------|--------|-----|-------------------------|
| S26 | SnO <sub>2</sub> /TiO <sub>2</sub> composite (1:1) | --- | mechanical blend | 7.5 μm | --- | TiCl <sub>4</sub> /6.17 |
|-----|----------------------------------------------------|-----|------------------|--------|-----|-------------------------|

|     |                                                                   |                         |                                                            |                 |      |                         |
|-----|-------------------------------------------------------------------|-------------------------|------------------------------------------------------------|-----------------|------|-------------------------|
| S29 | SnO <sub>2</sub><br>nanorod@TiO <sub>2</sub>                      | 150 nm×40<br>nm         | flame spray pyrolysis                                      | 12 μm           | 3.95 | TiCl <sub>4</sub> /6.98 |
| S30 | SnO <sub>2</sub><br>nanoparticles/ZnO<br>nanotetrapods            | 6-10<br>nm/40×500<br>nm | hydrothermal/metal<br>vapor transport-<br>oxidation method | 6 μm            | 6.31 | ---                     |
| S31 | SnO <sub>2</sub><br>nanoparticle-ZnO<br>nanorod                   | ---/103-291<br>nm×7μm   | hydrothermal                                               | 3 μm +4.4<br>μm | 2.62 | ---                     |
| S32 | SnO <sub>2</sub> NRs-TiO <sub>2</sub>                             | 50 nm×5 nm              | solution method                                            | 150nm+1<br>0μm  | 8.61 | ---                     |
| S33 | SnO <sub>2</sub> hollow<br>spheres-TiO <sub>2</sub><br>nanosheets | 500 nm                  | solvothetical<br>reaction                                  | 8μm             | 8.2  | ---                     |

<sup>a</sup>Surface treatment method and the corresponding photon-to-electron conversion efficiency.

## References:

- S1. Y. Fukai, Y. Kondo, S. Mori and E. Suzuki, *Electrochem. Commun.*, 2007, **9**, 1439-1443.
- S2. M. K. I. Senevirathna, P. Pitigala, E. V. A. Premalal, K. Tennakone, G. R. A. Kumara and A. Konno, *Sol. Energy Mater. Sol. Cells*, 2007, **91**, 544-547.
- S3. S. Gubbala, V. Chakrapani, V. Kumar and M. K. Sunkara, *Adv. Funct. Mater.*, 2008, **18**, 2411-2418.
- S4. J. F. Qian, P. Liu, Y. Xiao, Y. Jiang, Y. L. Cao, X. P. Ai and H. X. Yang, *Adv. Mater.*, 2009, **21**, 3663.
- S5. J. Y. Liu, T. Luo, T. S. Mouli, F. L. Meng, B. Sun, M. Q. Li and J. H. Liu, *Chem. Commun.*, 2010, **46**, 472-474.
- S6. C. Prasittichai and J. T. Hupp, *J. Phys. Chem. Lett.*, 2010, **1**, 1611-1615.
- S7. E. Ramasamy and J. Lee, *J. Phys. Chem. C*, 2010, **114**, 22032-22037.
- S8. X. C. Dou, D. Sabba, N. Mathews, L. H. Wong, Y. M. Lam and S. Mhaisalkar, *Chem. Mater.*, 2011, **23**, 3938-3945.
- S9. M. H. Kim and Y. U. Kwon, *J. Phys. Chem. C*, 2011, **115**, 23120-23125.
- S10. K. Perera, S. G. Anuradha, G. R. A. Kumara, M. L. Paranawitharana, R. M. G. Rajapakse and H. M. N. Bandara, *Electrochim. Acta*, 2011, **56**, 4135-4138.
- S11. Z. Tebby, T. Uddin, Y. Nicolas, C. Olivier, T. Toupance, C. Labrugere and L. Hirsch, *ACS Appl. Mater. Interfaces*, 2011, **3**, 1485-1491.
- S12. A. Birkel, Y. G. Lee, D. Koll, X. Van Meerbeek, S. Frank, M. J. Choi, Y. S. Kang, K. Char and W. Tremel, *Energ. Environ. Sci.*, 2012, **5**, 5392-5400.
- S13. Z. Chen, Y. F. Tian, S. J. Li, H. W. Zheng and W. F. Zhang, *J. Alloy. Compd.*, 2012, **515**, 57-62.
- S14. P. Docampo, P. Tiwana, N. Sakai, H. Miura, L. Herz, T. Murakami and H. J. Snaith, *J. Phys. Chem. C*, 2012, **116**, 22840-22846.
- S15. C. T. Gao, X. D. Li, B. G. Lu, L. L. Chen, Y. Q. Wang, F. Teng, J. T. Wang, Z. X. Zhang, X. J. Pan and E. Q. Xie, *Nanoscale*, 2012, **4**, 3475-3481.
- S16. T. Krishnamoorthy, M. Z. Tang, A. Verma, A. S. Nair, D. Pliszka, S. G. Mhaisalkar and S. Ramakrishna, *J. Mater. Chem.*, 2012, **22**, 2166-2172.
- S17. Z. D. Li, Y. Zhou, T. Yu, J. G. Liu and Z. G. Zou, *Crystengcomm*, 2012, **14**, 6462-6468.
- S18. H. C. Pang, H. B. Yang, C. X. Guo and C. M. Li, *ACS Appl. Mater. Interfaces*, 2012, **4**, 6261-6265.
- S19. H. Wang, B. Li, J. Gao, M. Tang, H. B. Feng, J. H. Li and L. Guo, *Crystengcomm*, 2012, **14**, 5177-5181.

- S20. Y. F. Wang, K. N. Li, C. L. Liang, Y. F. Hou, C. Y. Su and D. B. Kuang, *J. Mater. Chem.*, 2012, **22**, 21495-21501.
- S21. J. Xing, W. Q. Fang, Z. Li and H. G. Yang, *Ind. Eng. Chem. Res.*, 2012, **51**, 4247-4253.
- S22. P. N. Zhu, M. V. Reddy, Y. Z. Wu, S. J. Peng, S. Y. Yang, A. S. Nair, K. P. Loh, B. V. R. Chowdari and S. Ramakrishna, *Chem. Commun.*, 2012, **48**, 10865-10867.
- S23. Z. D. Li, Y. Zhou, J. C. Song, T. Yu, J. G. Liu and Z. G. Zou, *J. Mater. Chem. A*, 2013, **1**, 524-531.
- S24. J. P. Correa Baena and A. G. Agrios, *J. Phys. Chem. C*, 2014, **118**, 17028-17035.
- S25. V. Ganapathy, E. H. Kong, Y. C. Park, H. M. Jang and S.-W. Rhee, *Nanoscale*, 2014, **6**, 3296-3301.
- S26. R. Kasaudhan, H. Elbohy, S. Sigdel, H. Qiao, Q. Wei and Q. Qiao, *IEEE Electron. Device Lett.* 2014, **35**, 578-580.
- S27. K. Manseki, T. Sugiura and T. Yoshida, *New J. Chem.*, 2014, **38**, 598-603.
- S28. H. Niu, S. Zhang, R. Wang, Z. Guo, X. Shang, W. Gan, S. Qin, L. Wan and J. Xu, *J. Phys. Chem. C*, 2014, **118**, 3504-3513.
- S29. J. Huo, Y. Hu, H. Jiang, W. Huang and C. Li, *J. Mater. Chem. A*, 2014, **2**, 8266-8272.
- S30. W. Chen, Y. C. Qiu, Y. C. Zhong, K. S. Wong and S. H. Yang, *J. Phys. Chem. A*, 2010, **114**, 3127-3138.
- S31. N. K. Huu, D. Y. Son, I. H. Jang, C. R. Lee and N. G. Park, *ACS Appl. Mater. Interfaces*, 2013, **5**, 1038-1043.
- S32. H. Song, K. H. Lee, H. Jeong, S. H. Um, G. S. Han, H. S. Jung and G. Y. Jung, *Nanoscale*, 2013, **5**, 1188-1194.
- S33. S. H. Ahn, D. J. Kim, W. S. Chi and J. H. Kim, *Adv. Funct. Mater.*, 2014, **24**, 5037-5044
